# Supplementary material for: Grapevine Resistant Cultivars: A Story Review and the Importance on the Related Wine Consumption Inclination
Source: MDPI journal article supplement (doi:10.3390/su15010390), 2022-12-26
Supplement: s1 [file s1]

### Supplemental Table S1: questionnaires for the consumers regarding test A

Le schede di rilevazione delle preferenze degli altri test sono uguali tranne che per le percentuali di riduzione di pesticidi.

**Si trova al supermercato e vuole comprare una bottiglia di vino. Confronti i seguenti prodotti e poi esprima le sue preferenze con un punteggio da 1 a 100 (100 è la massima preferenza). Compili tutte le caselle di risposta altrimenti il suo esercizio non sarà valido ai fini della ricerca.**

| Codice prodotto | Descrizione del vino     | Nei nostri vigneti riusciamo a ridurre i pesticidi del | Preferenza |
|-----------------|--------------------------|--------------------------------------------------------|------------|
| 88619           | Prosecco 5 €/bott.       | 20%                                                    |            |
| 17844           | Prosecco 5 €/bott.       | 60%                                                    |            |
| 74335           | Prosecco 9 €/bott.       | 80%                                                    |            |
| 49800           | Prosecco 5 €/bott.       |                                                        |            |
| 66043           | Ribolla gialla 5 €/bott. | 20%                                                    |            |
| 98495           | Prosecco 9 €/bott.       | 40%                                                    |            |
| 38175           | Ribolla gialla 5 €/bott. | 60%                                                    |            |
| 76689           | Ribolla gialla 9 €/bott. | 20%                                                    |            |
| 43505           | Ribolla gialla 5 €/bott. | 40%                                                    |            |
| 32992           | Ribolla gialla 5 €/bott. | 80%                                                    |            |
| 49822           | Prosecco 9 €/bott.       |                                                        |            |
| 90644           | Ribolla gialla 9 €/bott. | 60%                                                    |            |
| 17774           | Ribolla gialla 9 €/bott. | 20%                                                    |            |
| 11038           | Prosecco 5 €/bott.       | 80%                                                    |            |
| 64261           | Ribolla gialla 9 €/bott. |                                                        |            |
| 54224           | Prosecco 9 €/bott.       | 20%                                                    |            |
| 39051           | Prosecco 9 €/bott.       |                                                        |            |
| 44639           | Ribolla gialla 5 €/bott. | 40%                                                    |            |
| 89004           | Ribolla gialla 5 €/bott. |                                                        |            |
| 91732           | Prosecco 5 €/bott.       | 40%                                                    |            |
| 50831           | Ribolla gialla 9 €/bott. | 40%                                                    |            |

**Supplemental Table S2: Estimates of wine preferences according to the percentage reductions of pesticides in the vineyards. For each test and type, in figure 1, only the equation with R2 greater is represented and, if R2 is equal, the one with lower degree.**

|         |         |            | Riepilogo del modello |          |     |     |       | Stime di parametri |       |            |
|---------|---------|------------|-----------------------|----------|-----|-----|-------|--------------------|-------|------------|
|         |         |            | R-<br>quadrato        | F        | df1 | df2 | Sig.  | b1                 | b2    | b3         |
| Test    |         |            |                       |          |     |     |       |                    |       |            |
| A       | Maschio | Lineare    | 0.571                 | 418.075  | 1   | 314 | 0.000 | 0.452              |       |            |
|         |         | Quadratico | 0.576                 | 212.256  | 2   | 313 | 0.000 | 0.290              | 0.002 |            |
|         |         | Cubico     | 0.579                 | 143.270  | 3   | 312 | 0.000 | 0.091              | 0.017 | -1.262E-04 |
|         | Femmina | Lineare    | 0.716                 | 702.868  | 1   | 279 | 0.000 | 0.651              |       |            |
|         |         | Quadratico | 0.717                 | 352.752  | 2   | 278 | 0.000 | 0.532              | 0.002 |            |
|         |         | Cubico     | 0.718                 | 235.369  | 3   | 277 | 0.000 | 0.293              | 0.011 | -7.906E-05 |
| Test    |         |            |                       |          |     |     |       |                    |       |            |
| B       | Maschio | Lineare    | 0.485                 | 295.955  | 1   | 314 | 0.000 | 0.783              |       |            |
|         |         | Quadratico | 0.488                 | 149.349  | 2   | 313 | 0.000 | 0.506              | 0.008 |            |
|         |         | Cubico     | 0.488                 | 99.248   | 3   | 312 | 0.000 | 0.517              | 0.007 | 1.428E-05  |
|         | Femmina | Lineare    | 0.694                 | 484.350  | 1   | 214 | 0.000 | 1.264              |       |            |
|         |         | Quadratico | 0.703                 | 251.924  | 2   | 213 | 0.000 | 0.616              | 0.019 |            |
|         |         | Cubico     | 0.704                 | 168.031  | 3   | 212 | 0.000 | 0.102              | 0.059 | -6.922E-04 |
| Test    |         |            |                       |          |     |     |       |                    |       |            |
| C       | Maschio | Lineare    | 0.696                 | 547.069  | 1   | 239 | 0.000 | 2.010              |       |            |
|         |         | Quadratico | 0.696                 | 272.681  | 2   | 238 | 0.000 | 1.852              | 0.010 |            |
|         |         | Cubico     | 0.696                 | 181.163  | 3   | 237 | 0.000 | 1.387              | 0.076 | -2.220E-03 |
|         | Femmina | Lineare    | 0.729                 | 939.394  | 1   | 349 | 0.000 | 2.455              |       |            |
|         |         | Quadratico | 0.732                 | 475.627  | 2   | 348 | 0.000 | 1.764              | 0.042 |            |
|         |         | Cubico     | 0.733                 | 316.986  | 3   | 347 | 0.000 | 0.790              | 0.182 | -4.656E-03 |
| Test    |         |            |                       |          |     |     |       |                    |       |            |
| D       | Maschio | Lineare    | 0.531                 | 967.893  | 1   | 854 | 0.000 | 1.661              |       |            |
|         |         | Quadratico | 0.548                 | 517.215  | 2   | 853 | 0.000 | 0.516              | 0.068 |            |
|         |         | Cubico     | 0.548                 | 344.539  | 3   | 852 | 0.000 | 0.722              | 0.036 | 1.133E-03  |
|         | Femmina | Lineare    | 0.638                 | 893.975  | 1   | 507 | 0.000 | 2.158              |       |            |
|         |         | Quadratico | 0.645                 | 459.000  | 2   | 506 | 0.000 | 1.201              | 0.055 |            |
|         |         | Cubico     | 0.645                 | 305.500  | 3   | 505 | 0.000 | 1.456              | 0.015 | 1.377E-03  |
| Tet E   |         |            |                       |          |     |     |       |                    |       |            |
| Maschio | Maschio | Lineare    | 0.549                 | 1050.530 | 1   | 864 | 0.000 | 0.352              |       |            |
|         |         | Quadratico | 0.559                 | 546.732  | 2   | 863 | 0.000 | 0.149              | 0.003 |            |
|         |         | Cubico     | 0.559                 | 364.140  | 3   | 862 | 0.000 | 0.115              | 0.004 | -1.127E-05 |
|         | Femmina | Lineare    | 0.664                 | 916.377  | 1   | 464 | 0.000 | 0.471              |       |            |
|         |         | Quadratico | 0.670                 | 469.657  | 2   | 463 | 0.000 | 0.282              | 0.003 |            |
|         |         | Cubico     | 0.670                 | 312.475  | 3   | 462 | 0.000 | 0.315              | 0.001 | 1.113E-05  |

**Supplemental Table S2: Estimates of preferences for wine according to the percentage reductions of pesticides in vineyards by genus and cluster of consumers questioned. For each test, genus and cluster, in figure 2, only the equation with higher R2 is represented and, if R2 is equal, the one with lower degree.**

| Test | Genere  | Cluster    | Equazione  | Riepilogo del modello |          |          |       |       | Stime di parametri |        |        |       |
|------|---------|------------|------------|-----------------------|----------|----------|-------|-------|--------------------|--------|--------|-------|
|      |         |            |            | R-quadrato            | F        | df1      | df2   | Sig.  | b1                 | b2     | b3     |       |
| Test |         |            |            |                       |          |          |       |       |                    |        |        |       |
| D    | Maschi  | 1          | Lineare    | 0.236                 | 110.972  | 1        | 359   | 0.000 | 0.624              |        |        |       |
|      |         |            | Quadratico | 0.236                 | 55.340   | 2        | 358   | 0.000 | 0.651              | -0.002 |        |       |
|      |         |            | Cubico     | 0.242                 | 38.062   | 3        | 357   | 0.000 | 1.600              | -0.151 | 0.005  |       |
|      |         | 2          | Lineare    | 0.758                 | 1423.040 | 1        | 454   | 0.000 | 2.845              |        |        |       |
|      |         |            | Quadratico | 0.759                 | 714.307  | 2        | 453   | 0.000 | 2.415              | 0.025  |        |       |
|      |         |            | Cubico     | 0.761                 | 479.798  | 3        | 452   | 0.000 | 1.121              | 0.229  | -0.007 |       |
|      |         | Femmine    | 1          | Lineare               | 0.188    | 47.347   | 1     | 204   | 0.000              | 0.630  |        |       |
|      |         |            |            | Quadratico            | 0.199    | 25.144   | 2     | 203   | 0.000              | 1.205  | -0.034 |       |
|      |         |            |            | Cubico                | 0.206    | 17.421   | 3     | 202   | 0.000              | 2.347  | -0.214 | 0.006 |
|      | 2       |            | Lineare    | 0.871                 | 1976.965 | 1        | 294   | 0.000 | 2.441              |        |        |       |
|      |         |            | Quadratico | 0.871                 | 985.128  | 2        | 293   | 0.000 | 2.432              | 0.001  |        |       |
|      |         |            | Cubico     | 0.871                 | 659.451  | 3        | 292   | 0.000 | 3.147              | -0.112 | 0.004  |       |
|      | 3       | Lineare    | 0.935      | 2591.494              | 1        | 179      | 0.000 | 4.097 |                    |        |        |       |
|      |         | Quadratico | 0.936      | 1292.849              | 2        | 178      | 0.000 | 4.334 | -0.014             |        |        |       |
|      |         | Cubico     | 0.937      | 872.730               | 3        | 177      | 0.000 | 3.024 | 0.193              | -0.007 |        |       |
| Test |         |            |            |                       |          |          |       |       |                    |        |        |       |
| E    | Maschio | 1          | Lineare    | 0.566                 | 801.274  | 1        | 614   | 0.000 | 2.103              |        |        |       |
|      |         |            | Quadratico | 0.590                 | 440.314  | 2        | 613   | 0.000 | 1.491              | 0.023  |        |       |
|      |         |            | Cubico     | 0.683                 | 439.853  | 3        | 612   | 0.000 | 2.228              | 0.048  | -0.001 |       |
|      |         | 2          | Lineare    | 0.662                 | 487.634  | 1        | 249   | 0.000 | 1.191              |        |        |       |
|      |         |            | Quadratico | 0.664                 | 245.164  | 2        | 248   | 0.000 | 1.072              | 0.002  |        |       |
|      |         |            | Cubico     | 0.762                 | 263.514  | 3        | 247   | 0.000 | 1.022              | 0.024  | 0.000  |       |
|      |         | Femmina    | 1          | Lineare               | 0.931    | 1531.654 | 1     | 114   | 0.000              | 1.081  |        |       |
|      |         |            |            | Quadratico            | 0.935    | 819.276  | 2     | 113   | 0.000              | 1.341  | -0.004 |       |
|      |         |            |            | Cubico                | 0.938    | 566.056  | 3     | 112   | 0.000              | 0.905  | 0.011  | 0.000 |
|      | 2       |            | Lineare    | 0.540                 | 139.787  | 1        | 119   | 0.000 | 1.475              |        |        |       |
|      |         |            | Quadratico | 0.558                 | 74.608   | 2        | 118   | 0.000 | 1.113              | 0.009  |        |       |
|      |         |            | Cubico     | 0.718                 | 99.287   | 3        | 117   | 0.000 | 1.166              | 0.045  | -0.001 |       |
|      | 3       | Lineare    | 0.741      | 655.495               | 1        | 229      | 0.000 | 2.244 |                    |        |        |       |
|      |         | Quadratico | 0.758      | 358.005               | 2        | 228      | 0.000 | 3.108 | -0.028             |        |        |       |
|      |         | Cubico     | 0.778      | 265.340               | 3        | 227      | 0.000 | 2.256 | 0.053              | -0.002 |        |       |
